# Supplementary material for: Zigzag carbon as efficient and stable oxygen reduction electrocatalyst for proton exchange membrane fuel cells
Source: PubMed Central journal article supplement (PMC6145918; doi:10.1038/s41467-018-06279-x), 2018-09-19
Supplement: 41467_2018_6279_MOESM1_ESM.pdf [file 41467_2018_6279_MOESM1_ESM.pdf]

## **Supplementary Information**

**Zigzag Carbon as Highly Efficient and Stable Electrocatalyst for Oxygen Reduction  
Reaction in PEMFC**

**Xue et al.**

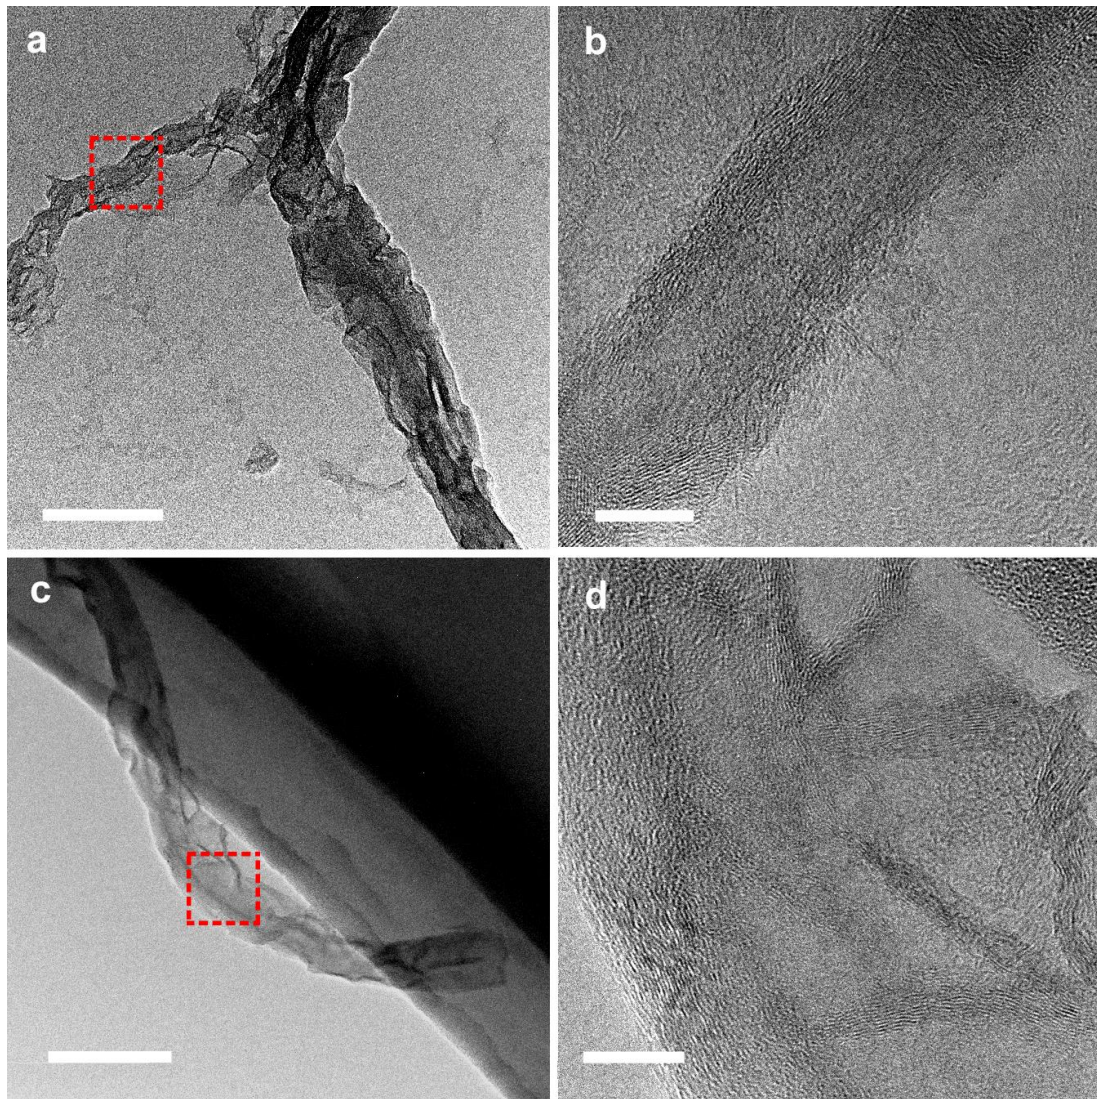

**Supplementary Figure 1 | Morphologies of oxidized-GNR@CNT and oxidized-GNR before annealing.** TEM images of (a-b) partially unzipped oxidized-GNR@CNT, and (c-d) fully unzipped oxidized-GNR. Scale bar in a, c is 100 nm, and in b, d is 10 nm.

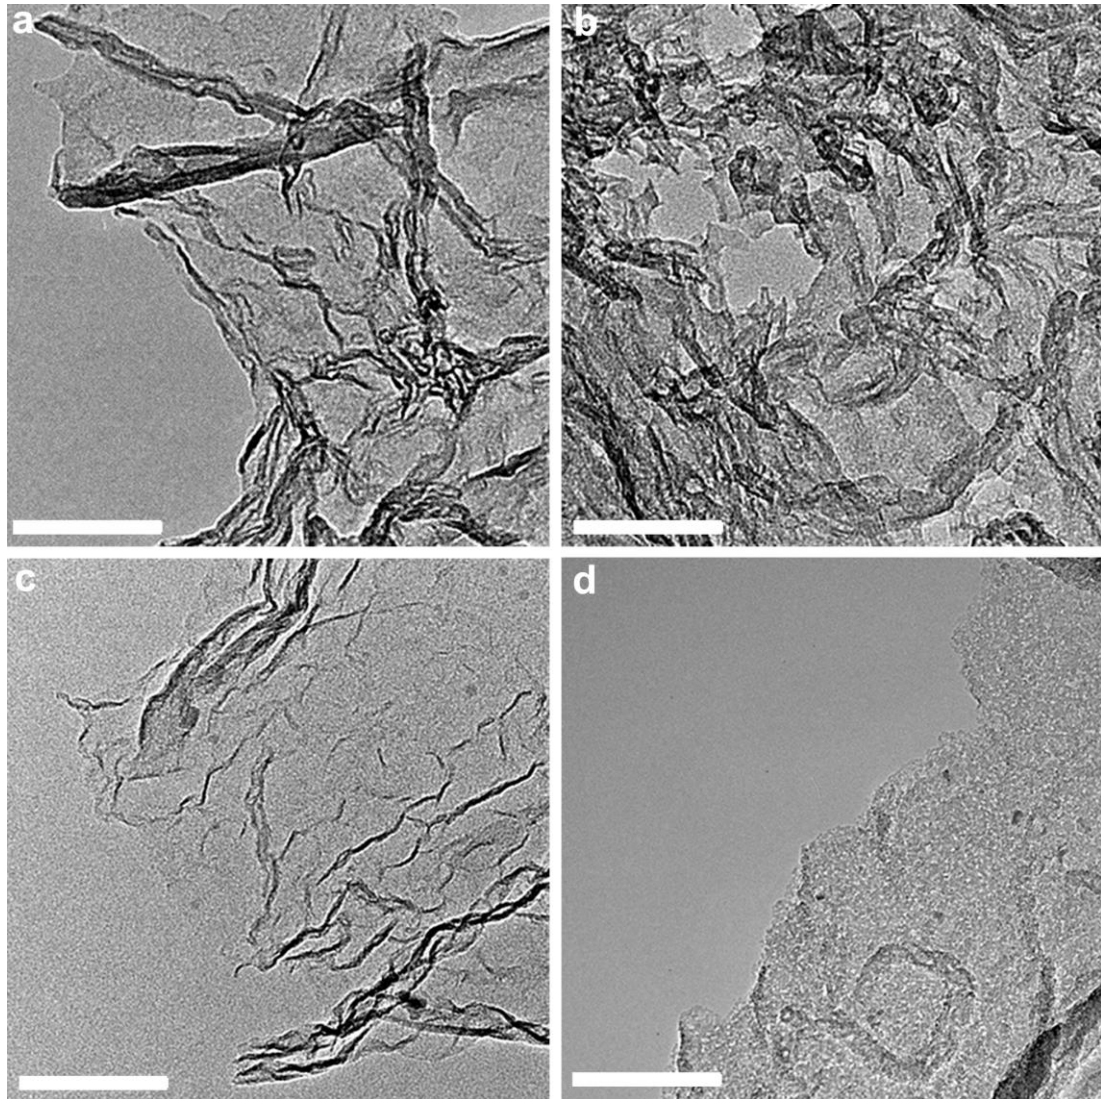

**Supplementary Figure 2 | Morphologies of four samples after annealing.** TEM images of (a) GNR@CNT, (b) N-GNR@CNT, (c) GNR and (d) N-GNR. Scale bar: 100 nm.

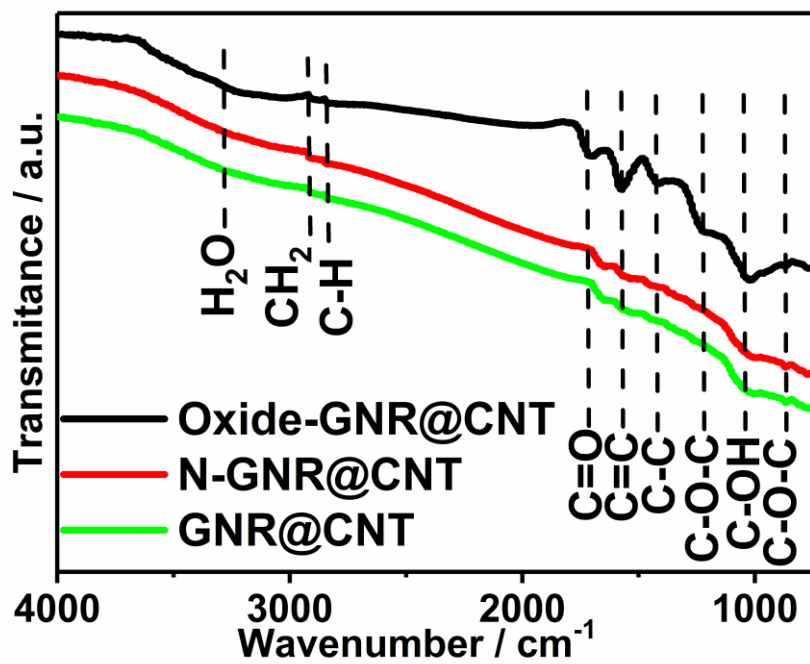

Supplementary Figure 3 | FT-IR spectra of Oxide-GNR@CNT, GNR@CNT and N-GNR@CNT.

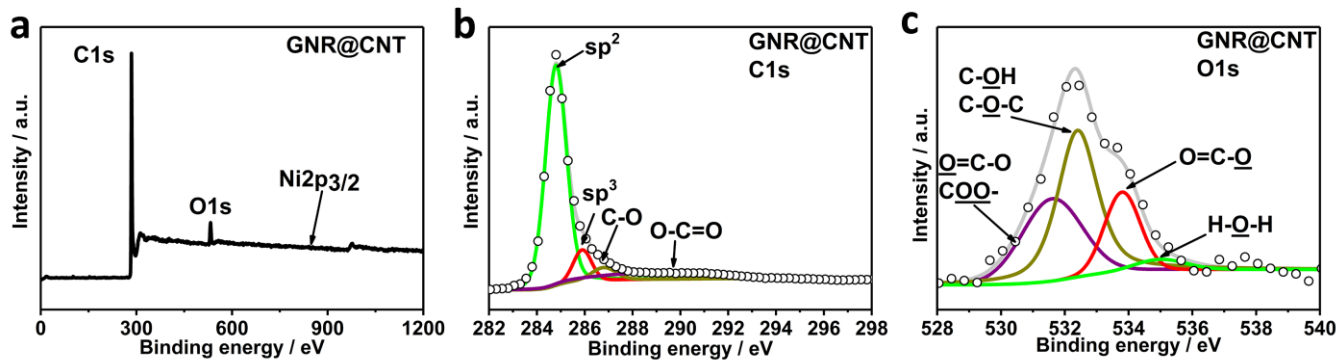

**Supplementary Figure 4 | XPS spectra of GNR@CNT.** (a) survey, and fine spectra of (b) C1s and (c) O1s.



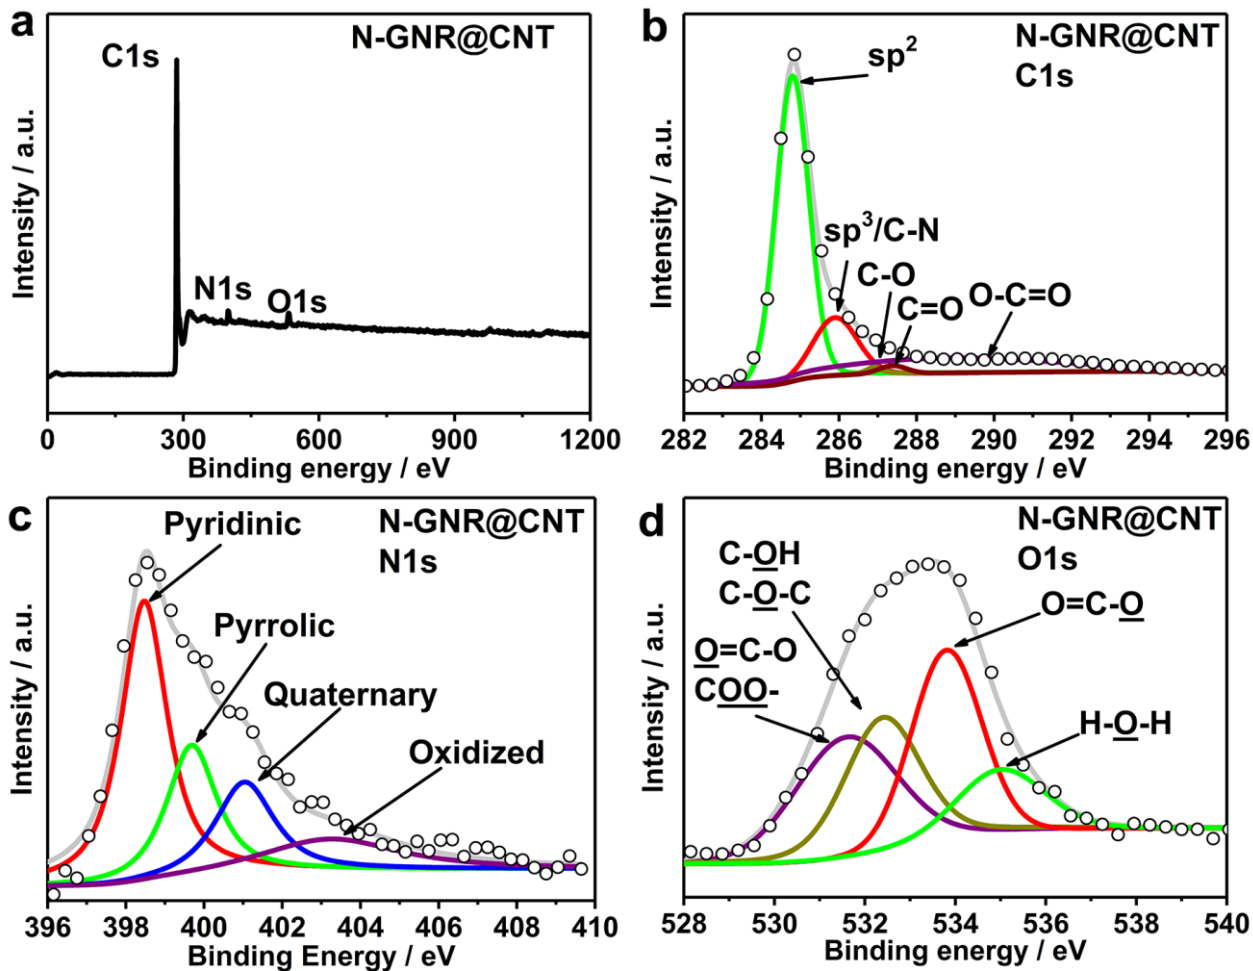

**Supplementary Figure 5 | XPS spectra of N-GNR@CNT.** (a) survey, and fine spectra of (b) C1s, (c) N1s and (d) O1s.

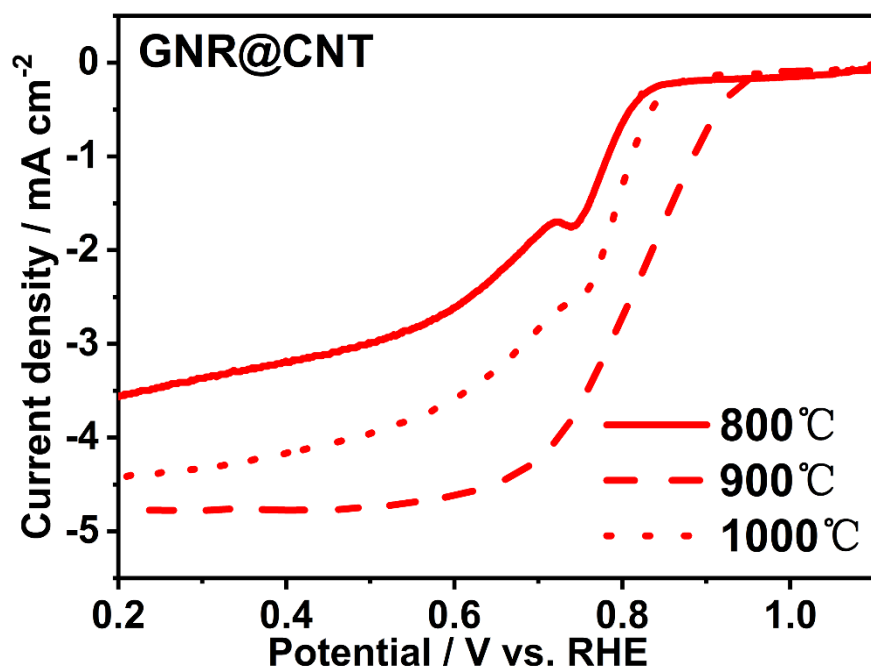

Supplementary Figure 6 | LSV curves of GNR@CNT annealed at different temperatures in Ar.

The ORR were measured in O<sub>2</sub>-saturated 0.1 M KOH at 1600 rpm. Scan rate: 10 mV s<sup>-1</sup>.

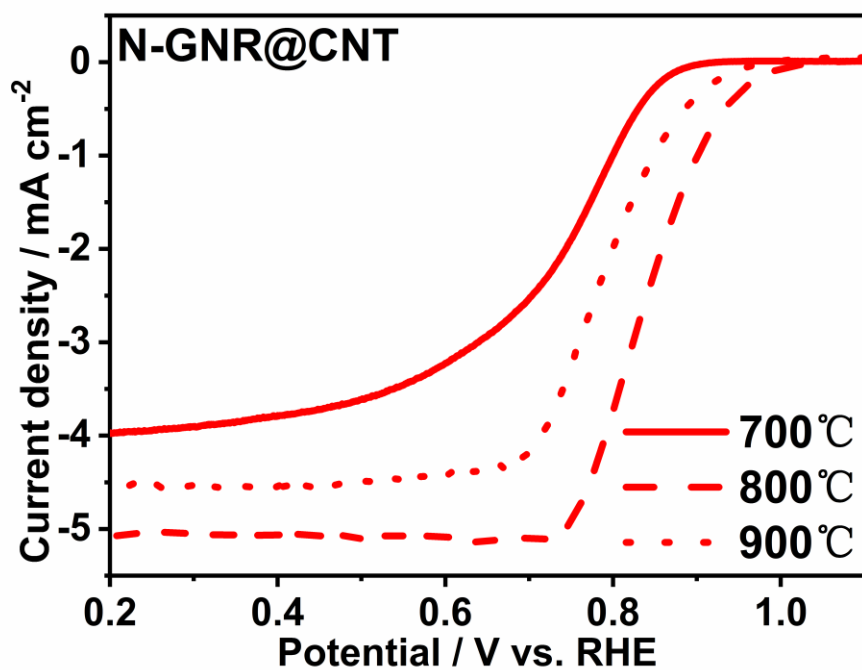

Supplementary Figure 7 | LSV curves of N-GNR@CNT annealed at different temperatures in NH<sub>3</sub>.

The ORR were measured in O<sub>2</sub>-saturated 0.1 M KOH at 1600 rpm. Scan rate: 10 mV s<sup>-1</sup>.



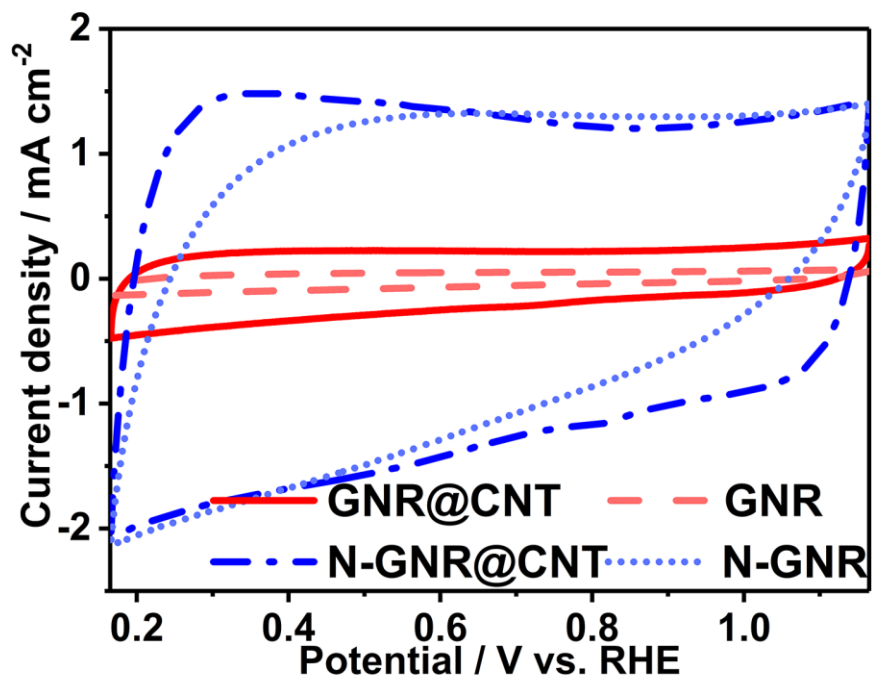

Supplementary Figure 8 | CV curves of four samples measured in N<sub>2</sub>-saturated 0.1 M KOH. Scan rate: 50 mV s<sup>-1</sup>.

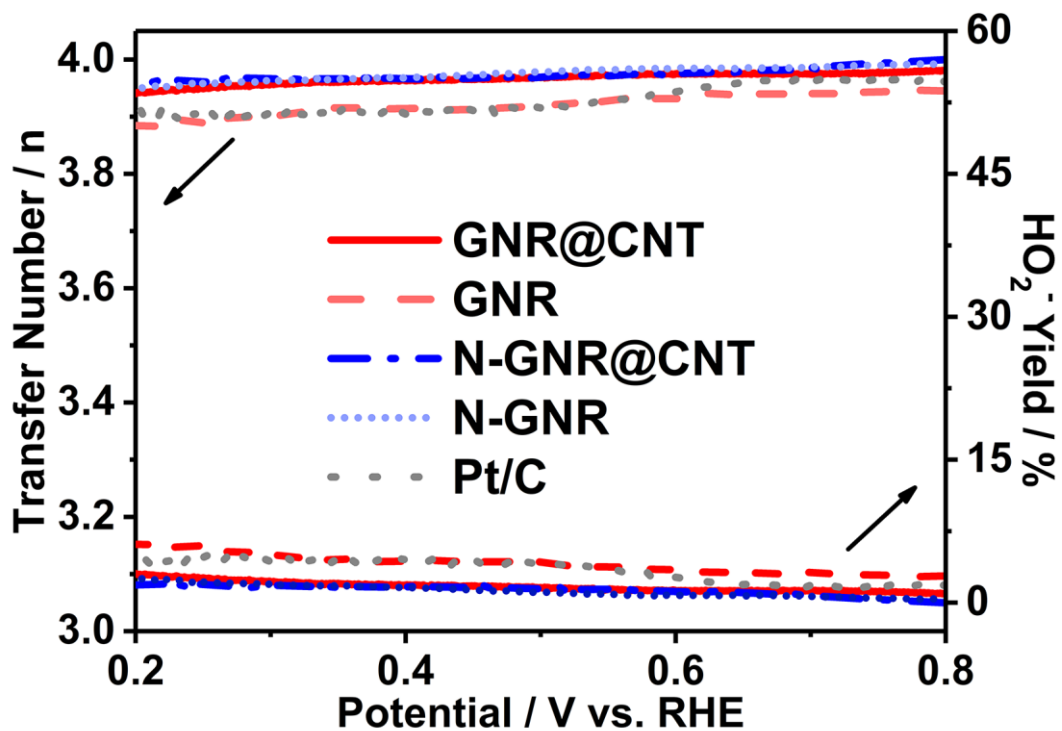

Supplementary Figure 9 | Electron transfer number and HO<sub>2</sub><sup>-</sup> yield of GNR@CNT, GNR, N-GNR@CNT, N-GNR and Pt/C in O<sub>2</sub>-saturated 0.1 M KOH at 1600 rpm. Scan rate: 10 mV s<sup>-1</sup>.

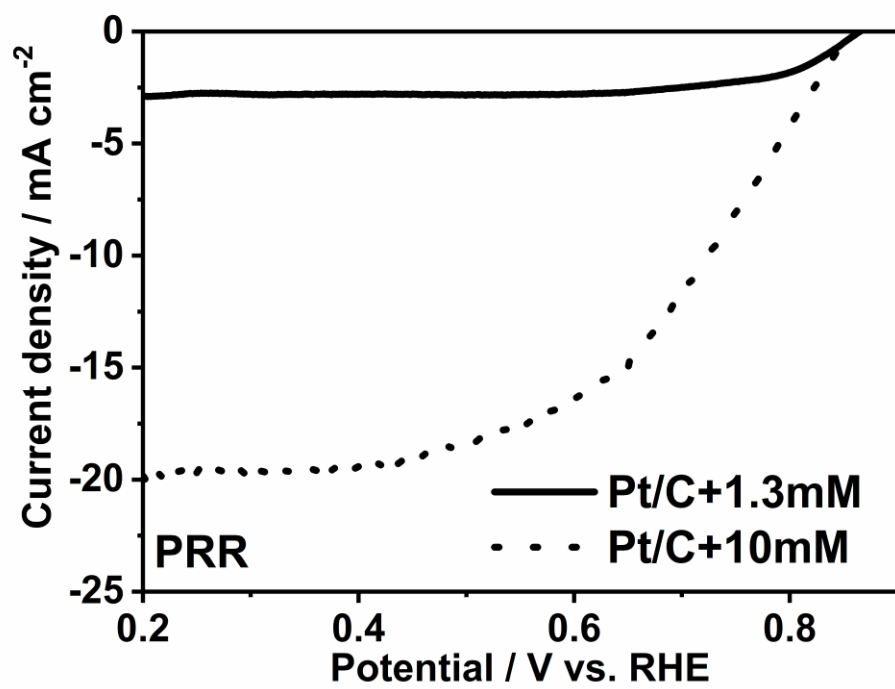

Supplementary Figure 10 | PRR polarization curves of Pt/C(20wt% Pt) measured in Ar-saturated 0.1 M KOH at 1600rpm. Scan rate: 10 mV s<sup>-1</sup>.

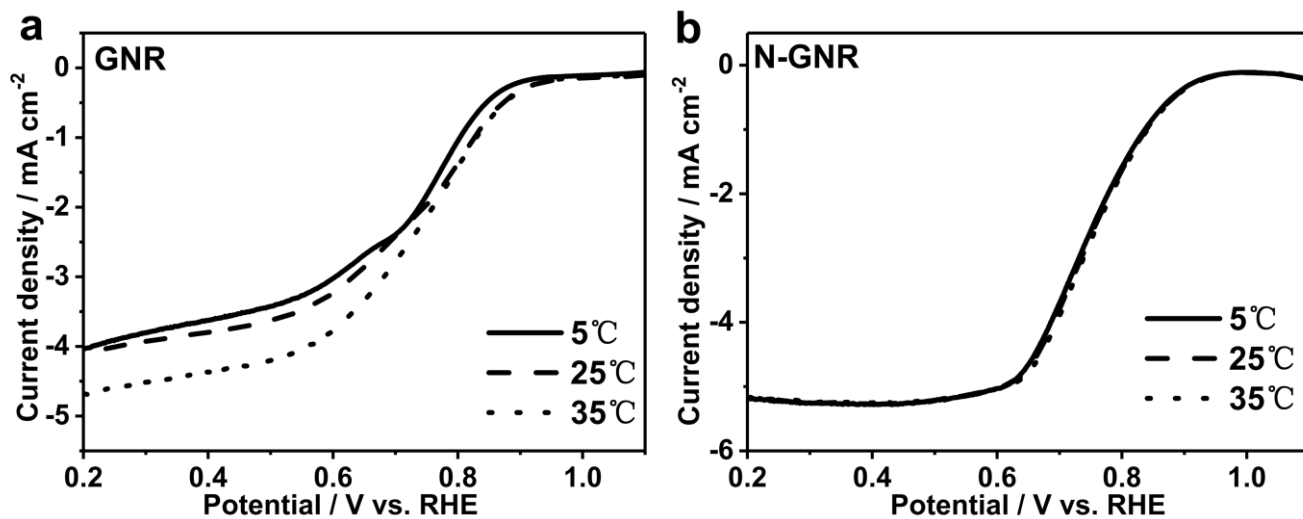

**Supplementary Figure 11 | ORR responses to the testing temperature in alkaline.** LSV curves of a) GNR and b) N-GNR measured at different temperatures in O<sub>2</sub>-saturated 0.1 M KOH at 1600 rpm. Scan rate: 10 mV s<sup>-1</sup>.

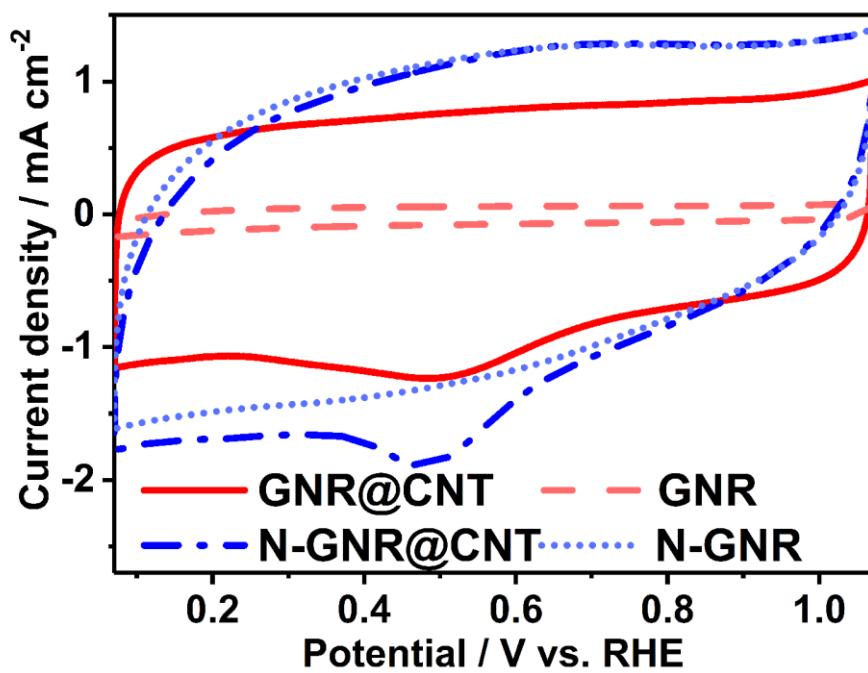

Supplementary Figure 12 | CV curves of indicated samples measured in N<sub>2</sub>-saturated 0.5 M H<sub>2</sub>SO<sub>4</sub>. Scan rate: 50 mV s<sup>-1</sup>.

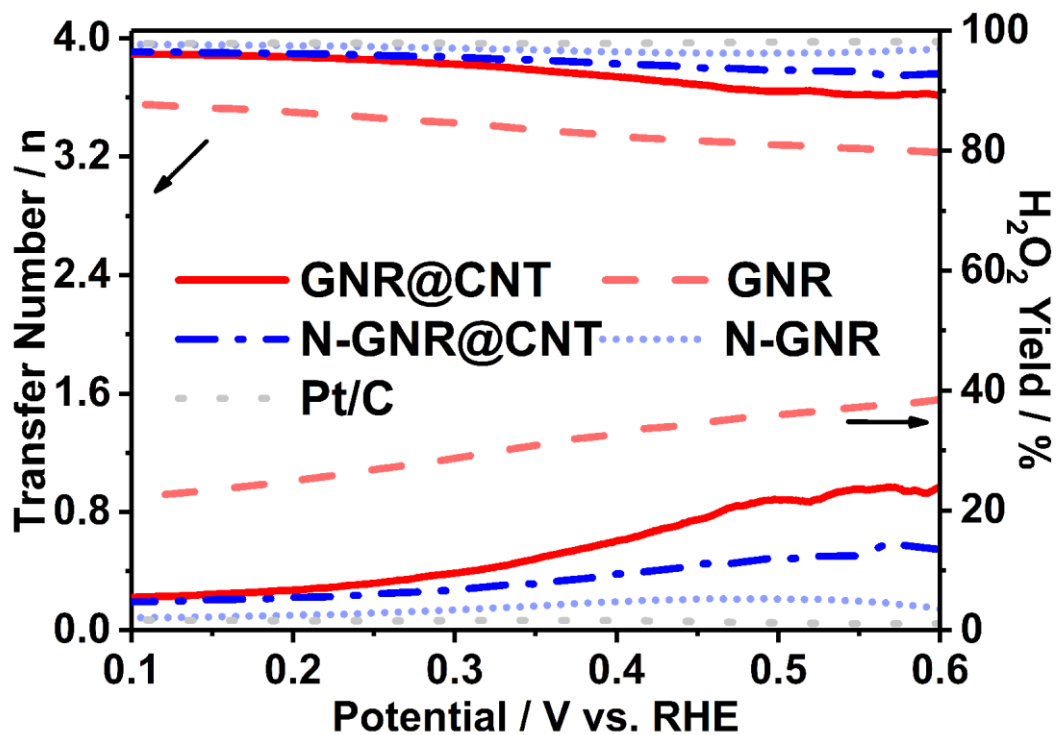

Supplementary Figure 13 | Electron transfer number and H<sub>2</sub>O<sub>2</sub> yield of GNR@CNT, GNR, N-GNR@CNT, N-GNR and Pt/C in O<sub>2</sub>-saturated 0.5 M H<sub>2</sub>SO<sub>4</sub> at 1600 rpm. Scan rate: 10 mV s<sup>-1</sup>.

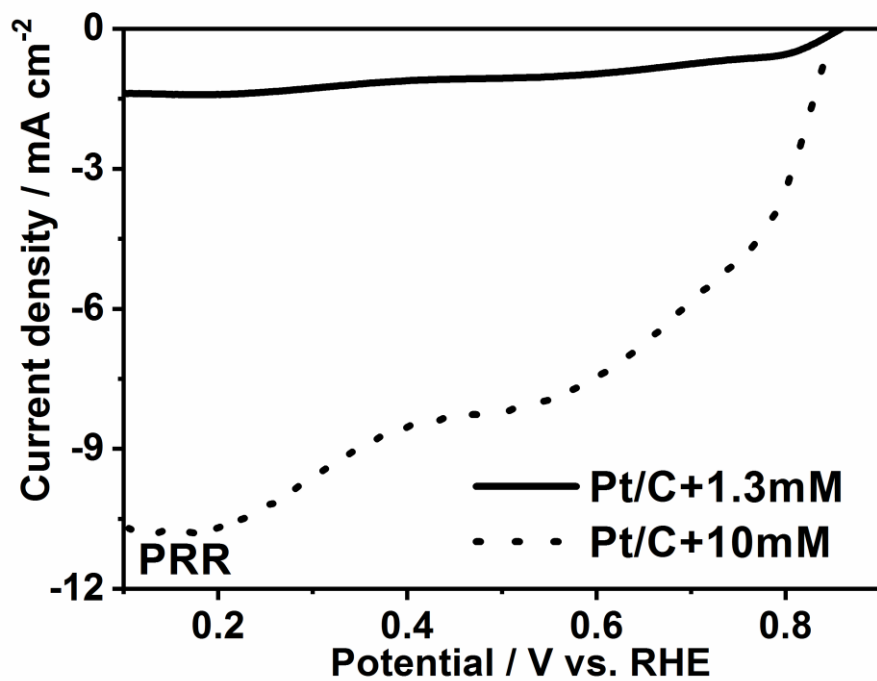

Supplementary Figure 14 | PRR polarization curves of Pt/C(20wt% Pt) measured in 0.5 M H<sub>2</sub>SO<sub>4</sub> at 1600 rpm. Scan rate: 10 mV s<sup>-1</sup>.



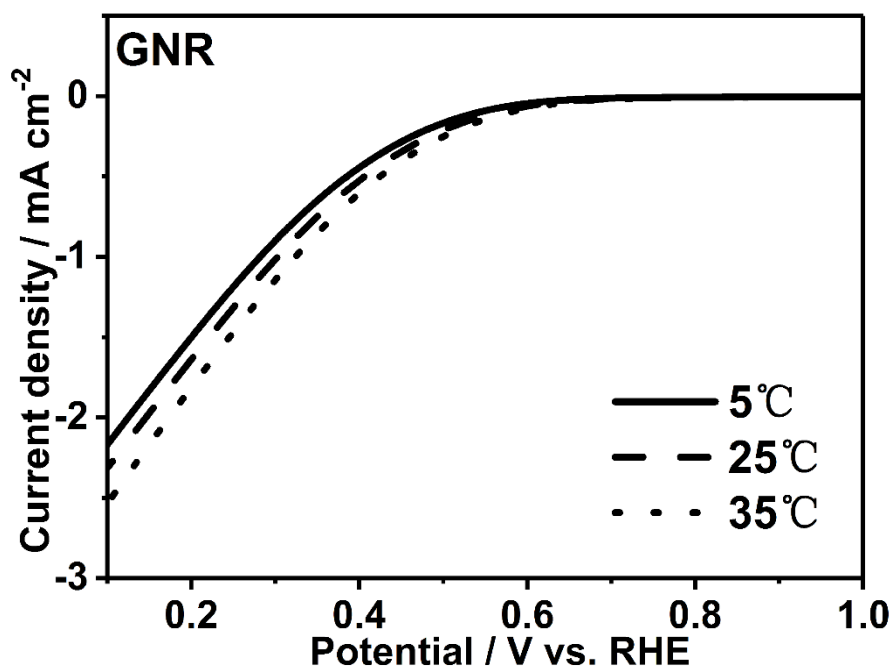

Supplementary Figure 15 | LSV curves of GNR measured at different temperatures in O<sub>2</sub>-saturated 0.5 M H<sub>2</sub>SO<sub>4</sub> at 1600 rpm. Scan rate: 10 mV s<sup>-1</sup>.

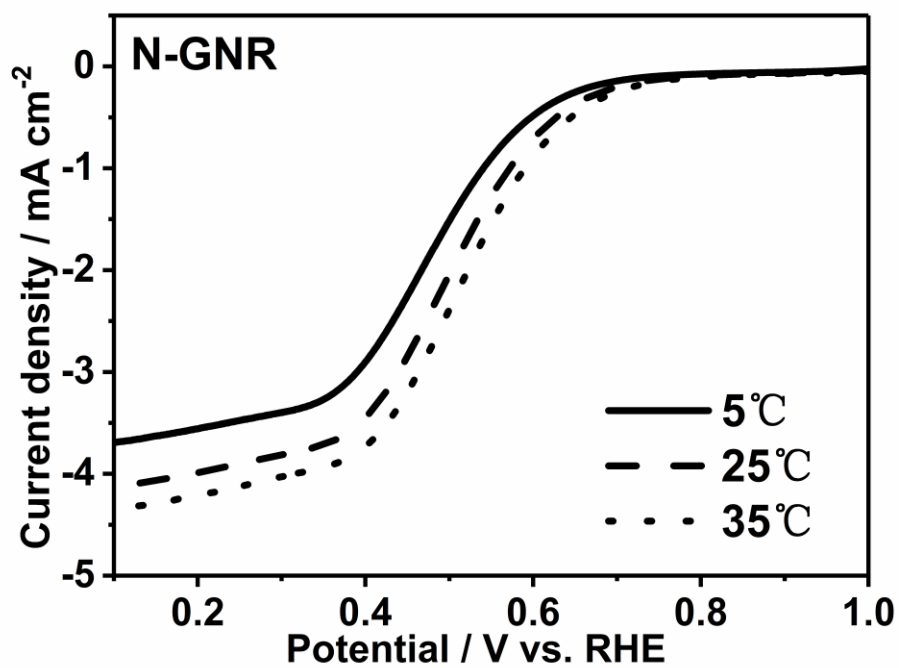

Supplementary Figure 16 | LSV curves of N-GNR measured at different temperatures in O<sub>2</sub>-saturated 0.5 M H<sub>2</sub>SO<sub>4</sub> at 1600 rpm. Scan rate: 10 mV s<sup>-1</sup>.

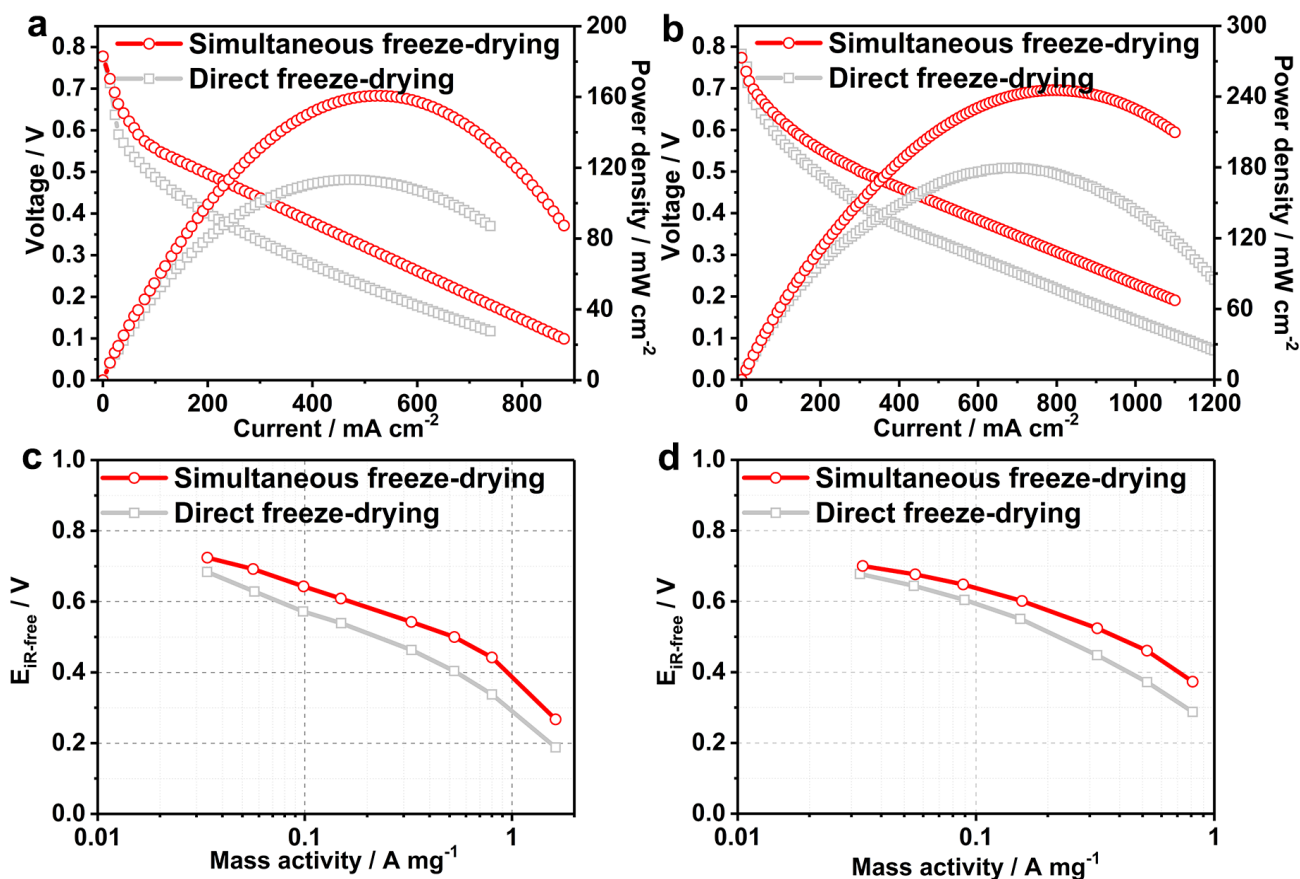

**Supplementary Figure 17 | Polarization and power density curves of a) GNR@CNT+XC-72 (0.4+1.6 mg cm<sup>-2</sup>) and b) N-GNR@CNT+XC-72 (0.9+2.2 mg cm<sup>-2</sup>), and polarization curves expressed by E<sub>iR-free</sub> vs Log mass activity of c) GNR@CNT+XC-72 (0.4+1.6 mg cm<sup>-2</sup>) and d) N-GNR@CNT+XC-72 (0.9+2.2 mg cm<sup>-2</sup>) as cathode in PEMFC measured with 2 bar H<sub>2</sub>-O<sub>2</sub>, 100% RH, 80 °C.**

Simultaneous freeze-drying: oxidized-GNR@CNT was mixed with XC-72 (spacer) first and then the mixture was freeze-dried and pyrolyzed. Direct freeze-drying: oxidized-GNR@CNT was freeze-dried and pyrolyzed to GNR@CNT or N-GNR@CNT first, and then they were mixed with XC-72 for catalyst ink. The PEMFC performance could be improved by enhancing the mass transfer of catalyst layer, through freeze-drying the catalyst precursor together with XC-72 before pyrolysis.

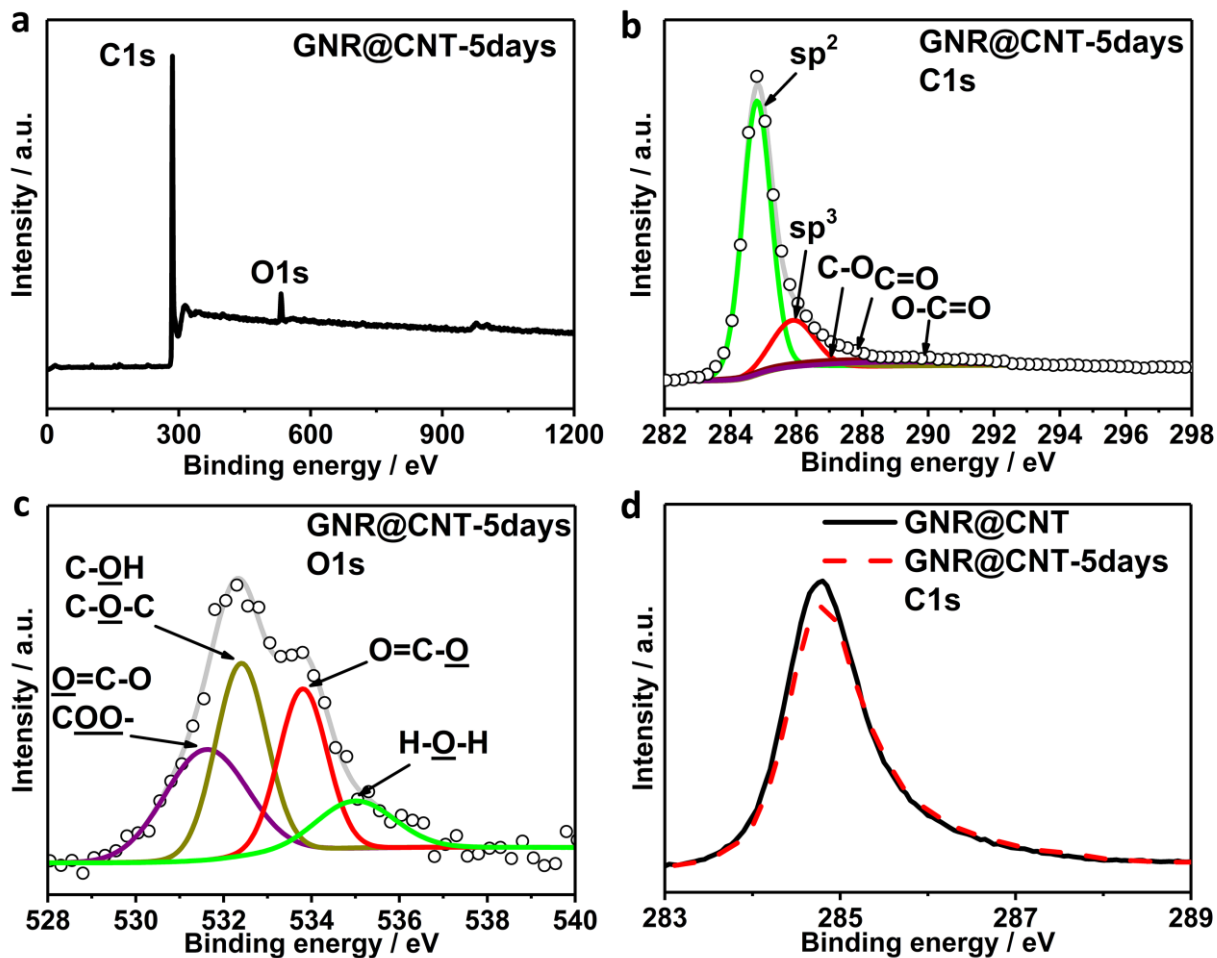

**Supplementary Figure 18 | XPS spectra of GNR@CNT-5days.** (a) survey, (b) C1s, (c) O1s and (d) a comparison of C1s spectra between GNR@CNT and GNR@CNT-5days.

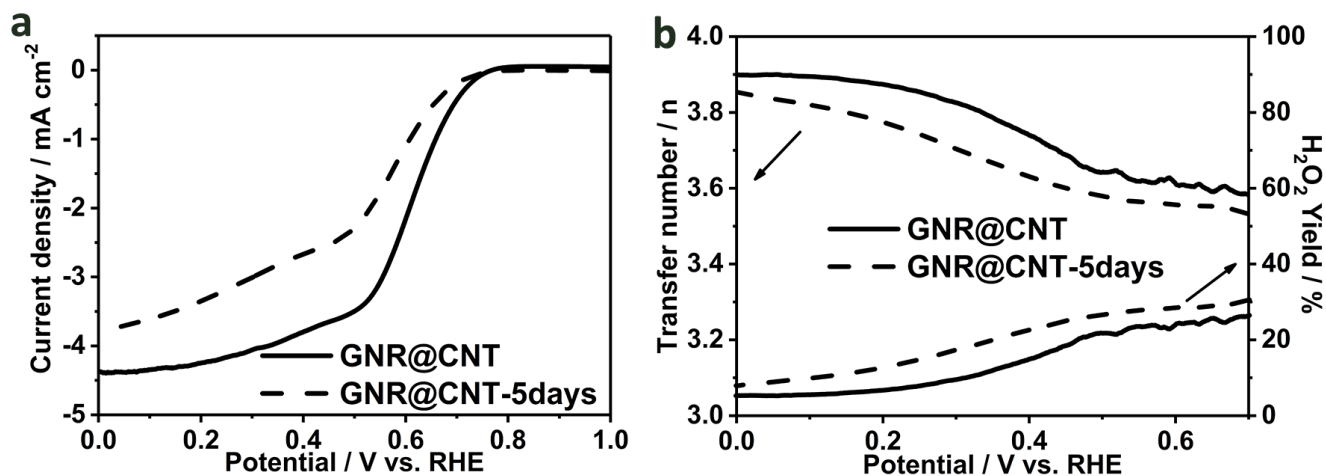

**Supplementary Figure 19 | Half-cell performance comparison after air oxidization.** (a) LSV curves and (b) electron transfer number and  $H_2O_2$  yield of GNR@CNT (fresh) and GNR@CNT-5days (after exposed in air for 5 days) in  $O_2$ -saturated 0.5 M  $H_2SO_4$  at 1600 rpm. Scan rate  $10\ mV\ s^{-1}$ .

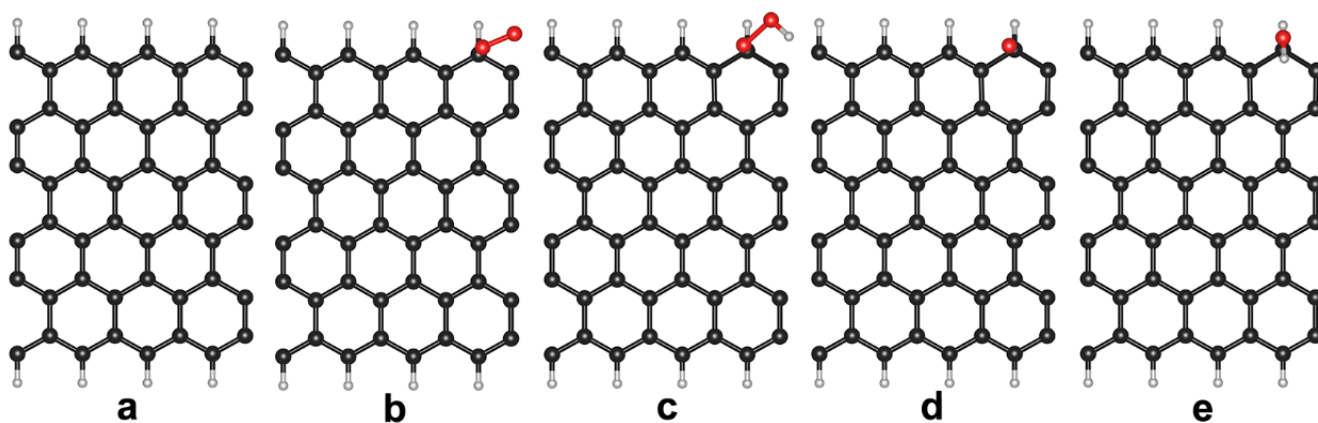

**Supplementary Figure 20 | Schematic representation of ORR process on the zigzag-edge of graphene nanoribbon.** (a) zigzag-edge graphene nanoribbons before ORR, (b) absorption of O<sub>2</sub> on a carbon at zigzag-edge, (c) adsorption of OOH after reaction with a proton, (d) adsorption of O after the release of a water molecule, and (e) adsorption of OH after reaction with a proton. Black, white, and red balls represent carbon, hydrogen, and oxygen atoms, respectively.

**Supplementary Table 1 | Relative elemental contents of GNR@CNT, N-GNR@CNT and GNR@CNT-5days extracted from the XPS results**

| Samples       | C1s [at.%] | sp <sup>2</sup> /sp <sup>3</sup> | N1s [at.%] | O 1s [at.%] |                                                            |                                                            |       |       |
|---------------|------------|----------------------------------|------------|-------------|------------------------------------------------------------|------------------------------------------------------------|-------|-------|
|               |            |                                  |            | Total       | $\begin{array}{c} \text{COO-} \\ \text{O=C-O} \end{array}$ | $\begin{array}{c} \text{C-OH} \\ \text{C-O-C} \end{array}$ | O=C-O | H-O-H |
| GNR@CNT       | 97.73      | 8.77                             | 0          | 2.27        | 0.73                                                       | 1.05                                                       | 0.41  | 0.07  |
| N-GNR@CNT     | 94.56      | 4.0 <sup>[a]</sup>               | 3.09       | 2.35        | --                                                         | --                                                         | --    | --    |
| GNR@CNT-5days | 97.59      | 3.94                             | 0          | 2.41        | 0.72                                                       | 0.79                                                       | 0.62  | 0.28  |

[a] C-N were contained in sp<sup>3</sup> for N-GNR@CNT.



**Supplementary Table 2 | ORR activities of carbon-based metal-free electrocatalyst from literatures measured by half-cell in 0.1 M KOH.**

| Catalyst              | Catalyst loading (mg cm <sup>-2</sup> ) | Onset Potential (V vs. RHE) | Scan rate (mV s <sup>-1</sup> ) | Rotation Rate (rpm) | Current Density at 0.4 V (mA cm <sup>-2</sup> ) | Electron transfer number (n) | Reference |
|-----------------------|-----------------------------------------|-----------------------------|---------------------------------|---------------------|-------------------------------------------------|------------------------------|-----------|
| VA-NCNT               | N.A.                                    | 0.976                       | 5                               | 1400                | -3.90                                           | 3.9                          | 1         |
| CNT                   | 0.255                                   | 0.846                       | 10                              | 1600                | -2.1                                            | 3.1                          | 2         |
| N-porous carbon sheet | 0.2                                     | 0.956                       | 5                               | 1600                | -6.2                                            | 3.98                         | 2         |
| N-graphene            | 0.038                                   | 0.936                       | 10                              | 1600                | -3.06                                           | 3.3                          | 3         |
| N-graphene/CNT        | 0.05                                    | 0.866                       | 20                              | 1600                | -3                                              | 3.7                          | 4         |
| N-graphitic arrays    | 0.026                                   | 0.687                       | 10                              | 1600                | -5.7                                            | 3.89                         | 5         |
| graphite-BM           | 0.1                                     | 0.816                       | 10                              | 1600                | -1.75                                           | 3.8                          | 6         |
| CNC700                | 0.1                                     | 0.876                       | 10                              | 2500                | -3.1                                            | 2.9                          | 7         |
| GNR                   | 0.398                                   | 0.919                       | 10                              | 1600                | -3.8                                            | 3.88                         | This work |
| N-GNR                 | 0.398                                   | 0.946                       | 10                              | 1600                | -5.2                                            | 3.95                         | This work |
| GNR@CNT               | 0.398                                   | 0.960                       | 10                              | 1600                | -4.8                                            | 3.94                         | This work |
| N-GNR@CNT             | 0.398                                   | 0.990                       | 10                              | 1600                | -5.1                                            | 3.96                         | This work |

**Supplementary Table 3 | ORR activities of carbon-based metal-free electrocatalysts from literatures (measured in acidic electrolytes).**

| Catalyst                              | Electrolyte                          | Catalyst loading (mg cm <sup>-2</sup> ) | Onset Potential (V vs. RHE) | Scan rate (mV s <sup>-1</sup> ) | Rotation Rate (rpm) | Current Density at 0.3 V (mA cm <sup>-2</sup> ) | Electron transfer number (n) | Reference |
|---------------------------------------|--------------------------------------|-----------------------------------------|-----------------------------|---------------------------------|---------------------|-------------------------------------------------|------------------------------|-----------|
| N and P codoped mesoporous nanocarbon | 0.1 M HClO <sub>4</sub>              | 0.450                                   | 0.83                        | 5                               | 1600                | 4.70                                            | 3.8                          | 8         |
| N doped carbon nanotubes              | 0.5 M H <sub>2</sub> SO <sub>4</sub> | N.A.                                    | 0.70                        | 10                              | 1600                | 1.73                                            | 3.52-3.92                    | 9         |
| N doped carbon nanosheets             | 0.5 M H <sub>2</sub> SO <sub>4</sub> | 0.600                                   | 0.72                        | 10                              | 1600                | 4.91                                            | 3.67-3.91                    | 10        |
| N doped carbon nanosheets             | 0.5 M H <sub>2</sub> SO <sub>4</sub> | 0.051                                   | 0.725                       | 20                              | 1600                | 2.17                                            | 3.90-3.98                    | 11        |
| N doped mesoporous carbons            | 0.5 M H <sub>2</sub> SO <sub>4</sub> | 0.312                                   | 0.720                       | 10                              | 1600                | 3.95                                            | 3.48                         | 12        |
| B and N codoped carbons               | 0.5 M H <sub>2</sub> SO <sub>4</sub> | 0.200                                   | 0.57                        | 10                              | 1500                | 0.68                                            | N.A.                         | 13        |
| GNR                                   | 0.5 M H <sub>2</sub> SO <sub>4</sub> | 0.398                                   | 0.52                        | 10                              | 1600                | 1.02                                            | 3.19-3.59                    | This work |
| N-GNR                                 | 0.5 M H <sub>2</sub> SO <sub>4</sub> | 0.398                                   | 0.68                        | 10                              | 1600                | 3.81                                            | 3.90-3.96                    | This work |
| GNR@CNT                               | 0.5 M H <sub>2</sub> SO <sub>4</sub> | 0.398                                   | 0.76                        | 10                              | 1600                | 4.06                                            | 3.61-3.90                    | This work |
| N-GNR@CNT                             | 0.5 M H <sub>2</sub> SO <sub>4</sub> | 0.398                                   | 0.75                        | 10                              | 1600                | 3.17                                            | 3.72-3.92                    | This work |

**Supplementary Table 4 | Gravimetric activities of various metal-free electrocatalysts compared with the N-GNR@CNT and GNR@CNT in PEM fuel cells.** All the data in the table have also been scaled by the electrode surface area.

| Materials                                   | Current at 0.2 V (A g <sup>-1</sup> ) | Peak power density (W g <sup>-1</sup> ) | Catalyst loading (mg cm <sup>-2</sup> ) | O <sub>2</sub> -H <sub>2</sub> absolute pressure (bars) | Cell temperature (°C) | Reference |
|---------------------------------------------|---------------------------------------|-----------------------------------------|-----------------------------------------|---------------------------------------------------------|-----------------------|-----------|
| Co-PPY-C                                    | 725                                   | 156                                     | 0.8 <sup>[a]</sup>                      | 2.5                                                     | 80                    | 14        |
| Fe/Phen/Z8                                  | 1500                                  | 233                                     | 3.9                                     | 1.5                                                     | N.A.                  | 15        |
| (CM+PANI)-Fe-C                              | 900                                   | 225                                     | 4.0                                     | 2.5                                                     | 80                    | 16        |
| 20Co-NC-1100                                | N.A.                                  | 140                                     | 4.0                                     | 2.5                                                     | 80                    | 17        |
| Fe <sub>2</sub> -Z8-C                       | N.A.                                  | 407                                     | 2.8                                     | 2.5                                                     | 80                    | 18        |
| (Fe,Co)/N-C                                 | N.A.                                  | 1272                                    | 0.77                                    | 2.5/1.5(O <sub>2</sub> /H <sub>2</sub> )                | 80                    | 19        |
| bNGr                                        | N.A.                                  | 52                                      | 4                                       | 2.5                                                     | N.A.                  | 20        |
| DMWNT-H <sub>2</sub> SO <sub>4</sub> -Ar900 | 297                                   | 60                                      | 1.85                                    | 3.5                                                     | 90                    | 21        |
| NG@MMT                                      | 750                                   | 160                                     | 2                                       | N.A.                                                    | N.A.                  | 22        |
| VA-NCNT                                     | 1550                                  | 320                                     | 0.16                                    | 2.5                                                     | 80                    | 23        |
| N-G-CNT+KB                                  | 1500                                  | 300                                     | 0.5                                     | 2.5                                                     | 80                    | 23        |
| N-GNR@CNT+XC-72                             | 2070/1950                             | 420 / 380                               | 0.25 / 0.5                              | 2.5                                                     | 80                    | This work |
| GNR@CNT+XC-72                               | 2400/1153                             | 520 / 235                               | 0.25 / 0.5                              | 2.5                                                     | 80                    | This work |

[a] Here we regard Co-PPY as catalyst and substrate the quality of carbon black.

**Supplementary Table 5 | Open circuit voltage (OCV) of metal-free catalysts in PEMFC.**

| Materials | Catalyst loading / mg cm <sup>-2</sup> | OCV / V <sub>RHE</sub> |
|-----------|----------------------------------------|------------------------|
| GNR       |                                        | 0.749                  |
| GNR@CNT   | 0.25                                   | 0.762                  |
| N-GNR     |                                        | 0.793                  |
| N-GNR@CNT |                                        | 0.772                  |
| GNR       |                                        | 0.611                  |
| GNR@CNT   | 0.5                                    | 0.776                  |
| N-GNR     |                                        | 0.794                  |
| N-GNR@CNT |                                        | 0.722                  |

## Supplementary references

- 1 Gong, K., Du, F., Xia, Z., Durstock, M. & Dai, L. Nitrogen-doped carbon nanotube arrays with high electrocatalytic activity for oxygen reduction. *Science* **323**, 760-764 (2009).
- 2 Zhong, H. X. *et al.* ZIF-8 derived graphene-based nitrogen-doped porous carbon sheets as highly efficient and durable oxygen reduction electrocatalysts. *Angew. Chem. Int. Ed.* **53**, 14235-14239 (2014).
- 3 Yang, S. *et al.* Efficient synthesis of heteroatom (N or S)-doped graphene based on ultrathin graphene oxide-porous silica sheets for oxygen reduction reactions. *Adv. Funct. Mater.* **22**, 3634-3640 (2012).
- 4 Chen, P., Xiao, T. Y., Qian, Y. H., Li, S. S. & Yu, S. H. A nitrogen-doped graphene/carbon nanotube nanocomposite with synergistically enhanced electrochemical activity. *Adv. Mater.* **25**, 3192-3196 (2013).
- 5 Liu, R., Wu, D., Feng, X. & Mullen, K. Nitrogen-doped ordered mesoporous graphitic arrays with high electrocatalytic activity for oxygen reduction. *Angew. Chem. Int. Ed.* **49**, 2565-2569 (2010).
- 6 Shen, A. *et al.* Oxygen reduction reaction in a droplet on graphite: direct evidence that the edge is more active than the basal plane. *Angew. Chem. Int. Ed.* **53**, 10804-10808 (2014).
- 7 Jiang, Y. *et al.* Significant contribution of intrinsic carbon defects to oxygen reduction activity. *ACS Catal.* **5**, 6707-6712 (2015).
- 8 Zhang, J., Zhao, Z., Xia, Z. & Dai, L. A metal-free bifunctional electrocatalyst for oxygen reduction and oxygen evolution reactions. *Nat. Nanotechnol.* **10**, 444-452 (2015).
- 9 Yu, D., Zhang, Q. & Dai, L. Highly efficient metal-free growth of nitrogen-doped single-walled carbon nanotubes on plasma-etched substrates for oxygen reduction. *J. Am. Chem. Soc.* **132**, 15127-15129 (2010).

- 10 Wei, W. *et al.* Nitrogen-doped carbon nanosheets with size-defined mesopores as highly efficient metal-free catalyst for the oxygen reduction reaction. *Angew. Chem. Int. Ed.* **53**, 1570-1574 (2014).
- 11 Chen, P. *et al.* Nitrogen-doped nanoporous carbon nanosheets derived from plant biomass: an efficient catalyst for oxygen reduction reaction. *Energy Environ. Sci.* **7**, 4095-4103 (2014).
- 12 Wang, X. *et al.* Ammonia-treated ordered mesoporous carbons as catalytic materials for oxygen reduction reaction. *Chem. Mater.* **22**, 2178-2180 (2010).
- 13 Ozaki, J.-I., Kimura, N., Anahara, T. & Oya, A. Preparation and oxygen reduction activity of BN-doped carbons. *Carbon* **45**, 1847-1853 (2007).
- 14 Bashyam, R. & Zelenay, P. A class of non-precious metal composite catalysts for fuel cells. *Nature* **443**, 63-66 (2006).
- 15 Proietti, E. *et al.* Iron-based cathode catalyst with enhanced power density in polymer electrolyte membrane fuel cells. *Nat. Commun.* **2**, 416 (2011).
- 16 Chung, H. T. *et al.* Direct atomic-level insight into the active sites of a high-performance PGM-free ORR catalyst. *Science* **357**, 479-484 (2017).
- 17 Wang, X. X. *et al.* Nitrogen-coordinated single cobalt atom catalysts for oxygen reduction in proton exchange membrane fuel cells. *Adv. Mater.* **30**, 1706758 (2018).
- 18 Liu, Q., Liu, X., Zheng, L. & Shui, J. The solid-phase synthesis of an Fe-N-C electrocatalyst for high-power proton-exchange membrane fuel cells. *Angew. Chem. Int. Ed.* **57**, 1204-1208 (2018).
- 19 Wang, J. *et al.* Design of N-coordinated dual-metal sites: a stable and active Pt-free catalyst for acidic oxygen reduction reaction. *J. Am. Chem. Soc.* **139**, 17281-17284 (2017).
- 20 Choi, C. H. *et al.* Long-range electron transfer over graphene-based catalyst for high-performing oxygen reduction reactions: importance of size, N-doping, and metallic impurities. *J. Am. Chem. Soc.* **136**, 9070-9077 (2014).

- 21 Waki, K. *et al.* Non-nitrogen doped and non-metal oxygen reduction electrocatalysts based on carbon nanotubes: mechanism and origin of ORR activity. *Energy Environ. Sci.* **7**, 1950-1958 (2014).
- 22 Ding, W. *et al.* Space-confinement-induced synthesis of pyridinic- and pyrrolic-nitrogen-doped graphene for the catalysis of oxygen reduction. *Angew. Chem. Int. Ed.* **52**, 11755-11759 (2013).
- 23 Shui, J., Wang, M., Du, F. & Dai, L. N-doped carbon nanomaterials are durable catalysts for oxygen reduction reaction in acidic fuel cells. *Sci. Adv.* **1**, e1400129 (2015).
